# Supplementary material for: Phosphorylation of AFAP-110 affects podosome lifespan in A7r5 cells
Source: Oxford University Press journal article supplement (doi:10.1242/jcs.026187), 2008-06-25

# **GFP-AFAP-110 colocalizes with actin filaments and a myosin ring in podosomes in A7r5 cells**

GFP-AFAP-110

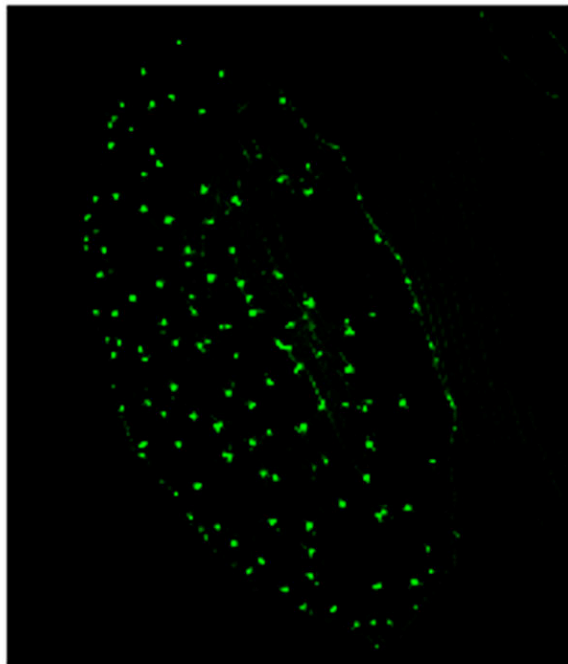

actin

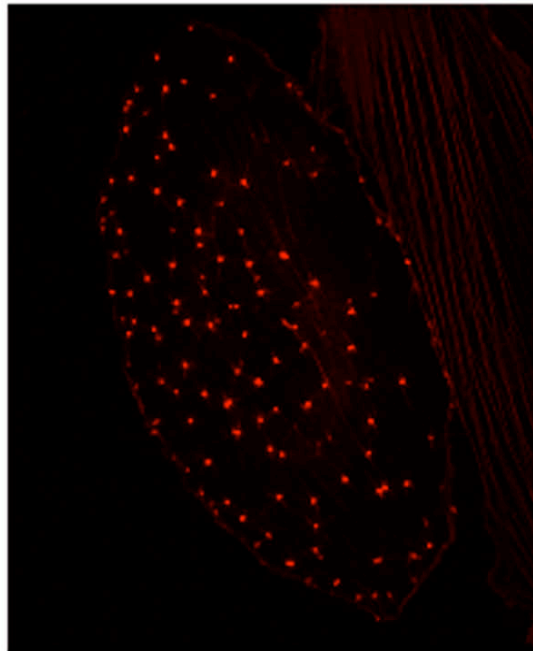

myosin II

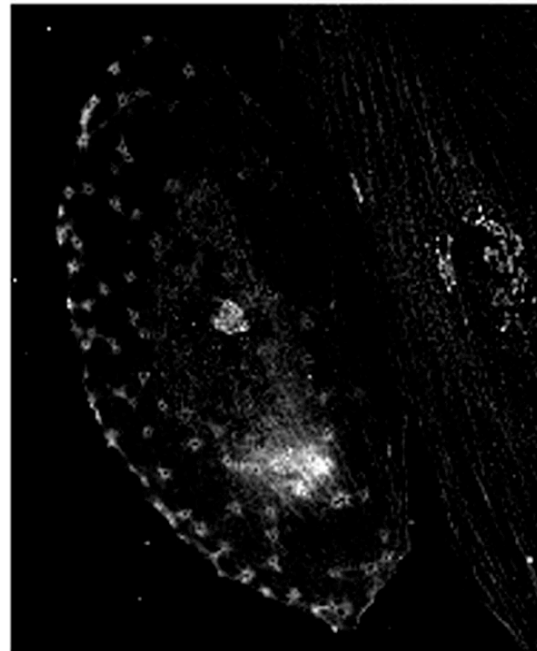

Supplement: jcs026187-sup-026187-figs2.pdf [file jcs026187-sup-026187-figs2.pdf]
