# Supplementary figures and images for: Phosphorylation of AFAP-110 affects podosome lifespan in A7r5 cells
Source: Oxford University Press journal article supplement (doi:10.1242/jcs.026187), 2008-06-25

# GFP-AFAP-110 in PMA induced podosomes in Cos-7 cells

phalloidin

GFP-AFAP

ⓅAFAP

ctrl.

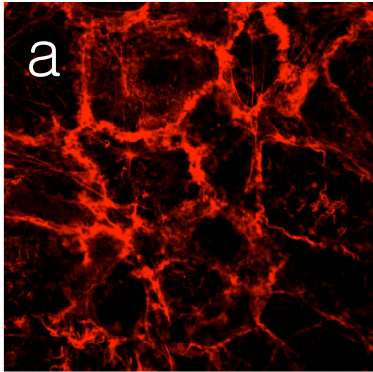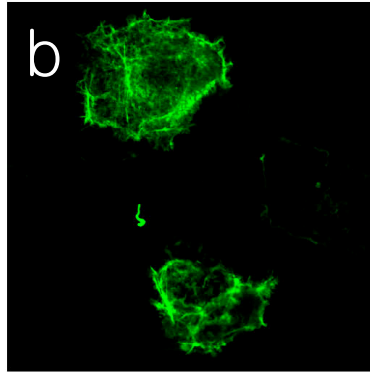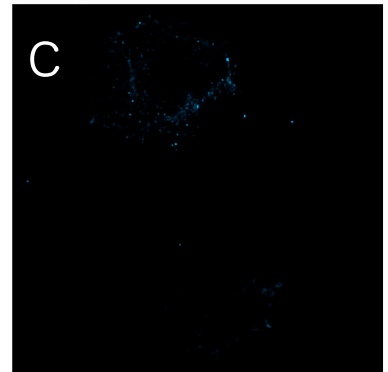

PMA

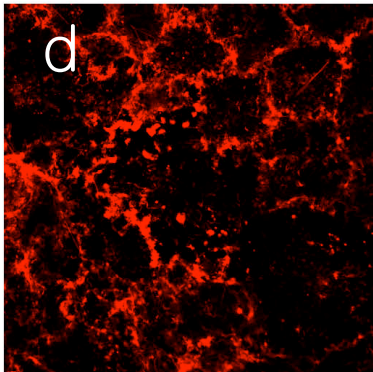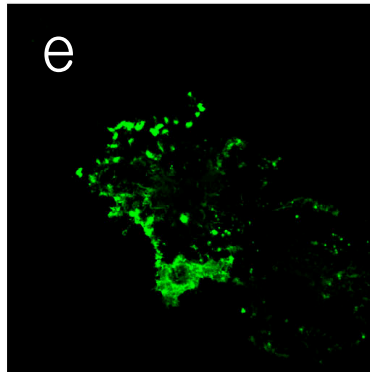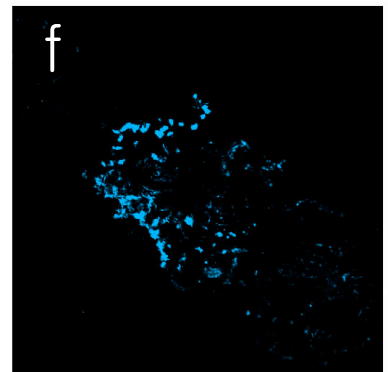

Supplement: jcs026187-sup-026187-figs1.pdf [file jcs026187-sup-026187-figs1.pdf]
